# Supplementary material for: Self-standing boron nitride bulks enabled by liquid metals for thermal management
Source: Royal Society of Chemistry journal article supplement (doi:10.1039/d3mh01359f), 2023-01-01
Supplement: d3mh01359f1.pdf [file d3mh01359f1.pdf]

Fig. S7. The cross-sectional SEM images of the LM-10-LM-15 bulk.

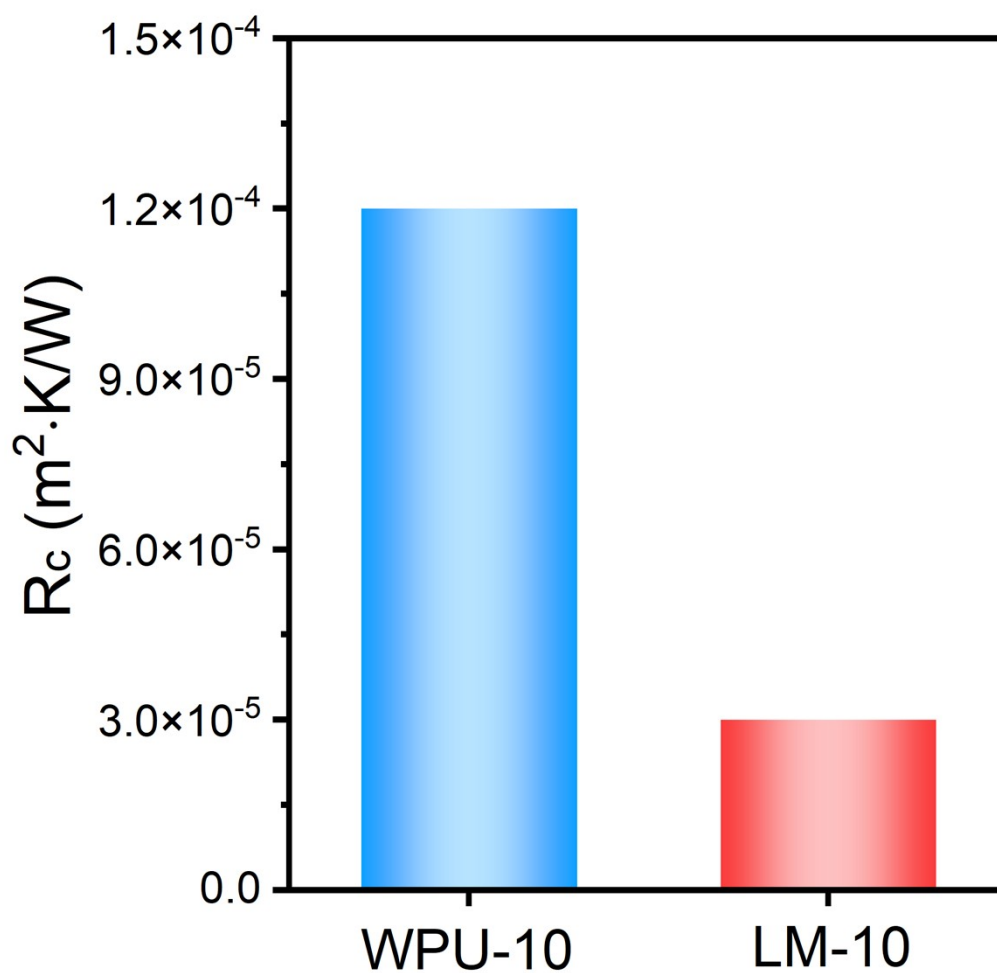

Fig. S12.  $R_s$ - $R_c$  of the LM-10 bulk and the WPU-10 composite.

Fig. S13.  $R_s$ - $R_c$  of the LM-10 bulk at various temperature.
